# Supplementary material for: Impairment of gut microbial biotin metabolism and host biotin status in severe obesity: effect of biotin and prebiotic supplementation on improved metabolism
Source: HighWire-hosted journal article supplement (doi:10.1136/gutjnl-2021-325753), 2022-01-11
Supplement: gutjnl-2021-325753supp001_data_supplement.pdf [file gutjnl-2021-325753supp001_data_supplement.pdf]

## 1 Supplemental Discussion

### 2 Clinical characteristics of the MetaCardis cohort

3 As expected, severely obese patients that were characterized as metabolically healthy  
4 differed from those presenting metabolic syndrome features or T2D in many aspects  
5 (**Supplemental Table 1**): they were younger, more often women, had a lower waist  
6 circumference, lower blood pressure, lower levels of fasting blood glucose, glycated  
7 hemoglobin, and triglycerides (but higher levels of HDL- cholesterol), lower concentrations of  
8 Alanine-aminotransferase (ALT), Aspartate-aminotransferase (AST), and  $\gamma$ -Glutamyl-  
9 transferase (GGT), as well as higher leisure-time physical activity. On the other hand,  
10 severely obese patients with T2D had a lower BMI, lower percentage of body fat and lower  
11 levels of ultra-sensitivity c-reactive protein (us-CRP). For some of the other inflammation  
12 markers measured, T2D patients had higher levels as compared to metabolically healthy  
13 participants, in particular high-sensitivity interleukin 6 (hs-IL-6), C-X-C motif chemokine  
14 ligand 5 (CXCL-5), eotaxin, macrophage inhibitory factor (MIF), and soluble CD14 (sCD14).

15

16 Among non-obese and moderately obese participants, relatively similar patterns differences  
17 across health groups were observed (**Supplemental Table 2**). However, inflammatory factor  
18 profiles were somewhat different. For example, non-obese and moderately obese T2D  
19 patients had higher us-CRP than their metabolically healthy counterparts.

20

21 **Supplemental Table 3** shows general drug treatment characteristics of participants. Among  
22 severely obese T2D patients, one quarter did not receive any antidiabetic drug treatment,  
23 while this proportion was lower than one tenth in non-obese and moderately obese T2D  
24 patients. **Supplemental Table 4** shows detailed drug treatment characteristics for  
25 MetaCardis participants with T2D. The majority of these patients (73.1%) received Metformin  
26 alone (15.2%) or in combination (57.8%) with another treatment.

27 Interestingly, in SOB group, despite being under the threshold of lower gene richness, T2D  
28 individuals not treated by metformin had increased gene richness compared to other SOB  
29 groups (**Supplemental Figure 1a**). The profile of these individuals was interesting since  
30 67% of them were not treated by other medication vs. 43% among NOB and 44% among  
31 MOB suggesting this profile could be influenced by a healthier status. These subjects  
32 received also less antidiabetic drugs in comparison with NOB and MOB ( $\text{Chi}^2=13.91$ ,  $P$   
33  $=7.6 \times 10^{-3}$ ; Chi-square test). In contrast, individuals with T2D treated with metformin shows a

34 more complex medication profile, which increases in severe obese states (**Supplemental**  
35 **Table 4**).

36

37

## 38 Mouse experiments of HFD and prebiotic supplementation

39 Prebiotics have been shown to increase gut microbiota diversity and composition, but their  
40 effect on serum biotin is unknown. We examined the effect of a prebiotic intervention in  
41 C57BL/6J male mice fed a HFD by supplementing drinking water with fructo-oligosaccharides  
42 (FOS) (HFD+FOS) for three months. We observed an increase in plasma biotin after one  
43 month of treatment compared to non-treated HFD-fed animals (**Supplemental Figure 5c** left,  
44 HFD vs. HFD+FOS:  $\text{Chi}^2= 2.08$ ,  $p\text{-value}=5.60 \times 10^{-2}$ , KW with Dunn's multiple comparison  
45 test), that reached significance after three months (**Supplemental Figure 5c** right, right HFD  
46 vs. HFD+FOS:  $\text{Chi}^2= 2.54$ ,  $p\text{-value}=1.65 \times 10^{-2}$ , KW with Dunn's multiple comparison test). At  
47 three months, plasma biotin of the HFD+FOS group was similar to the chow group, suggesting  
48 that FOS supplementation alleviates the impact of a HFD on circulating biotin. Using shotgun  
49 sequencing, we sequenced the gut microbiota and observed a major shift at the phylum level  
50 in the mouse models (**Supplemental Figure 5b**). In contrast with human obesity, we observed  
51 a bloom in Firmicutes in the HFD group mainly explained by a major expansion of *Lactococcus*  
52 *lactis* whereas FOS supplementation caused a significant expansion of *Bifidobacterium*  
53 *animalis*, contributing to the increase in Actinobacteria in comparison to Chow and HFD  
54 groups (**Supplemental Figure 5b**). Despite these changes, animals fed a chow diet  
55 harboured a more diverse microbiome composition at phylum level with a predominance of  
56 Bacteroidetes in comparison with HFD and HFD+FOS groups (**Supplemental Figure 5b**).  
57 When we quantified the relative abundance of different bacterial groups of biotin producers  
58 and transporters, we observed that one month after the intervention, FOS supplementation  
59 led to significant increases of biotin producers (bacteria with all genes involved in biotin  
60 biosynthesis Pimeloyl-ACP or pimelate and with no biotin transport genes) in comparison with  
61 HFD group ( $\text{FDR}=1.13 \times 10^{-4}$  Kruskal-Wallis test and  $\text{FDR}=7.20 \times 10^{-4}$  pairwise Wilcoxon rank-  
62 sum test) in parallel with a significant decrease of biotin transporters (bacteria with incomplete  
63 biotin biosynthesis pathway) ( $\text{FDR}=1.13 \times 10^{-4}$  Kruskal-Wallis test and  $\text{FDR}=8.68 \times 10^{-4}$   
64 pairwise Wilcoxon rank-sum test), with no impact on the group of bacteria capable of biotin  
65 synthesis and transport (**Supplemental Figure 5d**). Similar results were observed 3 months  
66 after the intervention (**Supplemental Figure 5d**). To note, results were not changed when  
67 taking into account the total bacterial abundance (**Supplemental Figure 5e**).

68

69
