# Supplementary material for: Impairment of gut microbial biotin metabolism and host biotin status in severe obesity: effect of biotin and prebiotic supplementation on improved metabolism
Source: HighWire-hosted journal article supplement (doi:10.1136/gutjnl-2021-325753), 2022-01-11
Supplement: gutjnl-2021-325753supp003_data_supplement.pdf [file gutjnl-2021-325753supp003_data_supplement.pdf]

|                               |                                                                                                                                                                                                                                                                                                                                                                                                                                                                                                                                                                                   |
|-------------------------------|-----------------------------------------------------------------------------------------------------------------------------------------------------------------------------------------------------------------------------------------------------------------------------------------------------------------------------------------------------------------------------------------------------------------------------------------------------------------------------------------------------------------------------------------------------------------------------------|
| <b>Supplementary table S1</b> | <b>Bioclinical characteristics of subject with severe obesity, stratified by metabolic health groups:</b> Values are n(%) for categorical variables and median (1st quartile, 3rd quartile) for continuous variables. P-values were obtained via Chi <sup>2</sup> tests and Kruskal-Wallis tests, respectively. Abbreviations: SOB-MH: severely obese, metabolically healthy; SOB-MUH: severely obese, metabolically unhealthy; SOB-T2D: severely obese, type 2 diabetic.                                                                                                         |
| <b>Supplementary table S2</b> | <b>Bioclinical characteristics of non-obese and moderately obese participants, stratified by study groups:</b> Values are n(%) for categorical variables and median (1st quartile, 3rd quartile) for continuous variables. P-values were obtained via Chi <sup>2</sup> tests and Kruskal-Wallis tests, respectively - for the comparison of differences between groups NOB-MH, NOB-MUH, NOB-T2D and between groups MOB-MH, MOB-MUH, MOB-T2D. Abbreviations: NOB: non-obese; MOB: moderately obese; MH: metabolically healthy; MUH: metabolically unhealthy; T2D: type-2 diabetic. |
| <b>Supplementary table S3</b> | <b>Drug treatment characteristics of participants, stratified by obesity groups:</b> Values are n (%). "Insulin" includes both basal and bolus insulin. Abbreviations: NON-SOB: not severely obese; SOB: severely obese; MH: metabolically healthy; MUH: metabolically unhealthy; T2D: type 2 diabetic                                                                                                                                                                                                                                                                            |
| <b>Supplementary table S4</b> | <b>Types of antidiabetic medications prescribed within the study groups including diabetic participants:</b> This table only shows isolated drug treatments or treatment combination with a frequency of n>=10. Values are n(%), and p-values for differences across obesity groups were obtained from Chi <sup>2</sup> tests, except for "Sulfonylurea only", "Metformin + Insulin", and "Metformin + GLP-1 receptor antagonists + Sulfonylurea", where Fisher's exact tests were used                                                                                           |

## Supplementary Table 1

|                                                | SOB-MH                              | SOB-MUH                             | SOB-T2D                   | p      |
|------------------------------------------------|-------------------------------------|-------------------------------------|---------------------------|--------|
| <b>n</b>                                       | 161                                 | 219                                 | 228                       |        |
| <b>Age, y</b>                                  | 43.00 [33.00, 52.00]                | 48.00 [37.00, 56.50]                | 57.00 [47.00, 63.25]      | <0.001 |
| <b>Gender = Male</b>                           | 28 (17.4)                           | 52 (23.7)                           | 87 (38.2)                 | <0.001 |
| <b>Country</b>                                 |                                     |                                     |                           | 0.033  |
| <b>Danemark</b>                                | 2 (1.2)                             | 13 (5.9)                            | 11 (4.8)                  |        |
| <b>France</b>                                  | 90 (55.9)                           | 92 (42.0)                           | 106 (46.5)                |        |
| <b>Germany</b>                                 | 69 (42.9)                           | 114 (52.1)                          | 111 (48.7)                |        |
| <b>Body mass index, kg/m<sup>2</sup></b>       | 41.59 [38.42, 45.80]                | 42.77 [38.99, 48.72]                | 40.87 [37.14, 46.63]      | 0.004  |
| <b>% Body fat</b>                              | 47.61 [45.17, 50.56]                | 48.42 [44.88, 51.16]                | 46.42 [40.93, 50.30]      | 0.001  |
| <b>Waist circumference, cm</b>                 | 119.10 [111.00, 128.20]             | 125.30 [115.75, 137.65]             | 126.00 [116.15, 140.00]   | <0.001 |
| <b>Systolic blood pressure, mm hg</b>          | 121.50 [115.00, 127.50]             | 131.25 [122.00, 139.50]             | 132.50 [120.50, 143.00]   | <0.001 |
| <b>Diastolic blood pressure, mm hg</b>         | 73.00 [66.50, 80.00]                | 76.50 [71.00, 86.50]                | 76.00 [67.50, 84.50]      | 0.001  |
| <b>Fasting blood glucose, mmol/l</b>           | 5.00 [4.70, 5.24]                   | 5.60 [5.10, 5.91]                   | 7.53 [6.21, 9.12]         | <0.001 |
| <b>HbA1c, %</b>                                | 5.55 [5.37, 5.80]                   | 5.72 [5.45, 6.00]                   | 6.80 [6.24, 7.62]         | <0.001 |
| <b>HDL cholesterol, mmol/l</b>                 | 1.37 [1.23, 1.60]                   | 1.15 [0.96, 1.38]                   | 1.14 [0.95, 1.36]         | <0.001 |
| <b>LDL cholesterol, mmol/l</b>                 | 3.06 [2.64, 3.64]                   | 3.43 [2.74, 4.00]                   | 2.89 [2.41, 3.52]         | <0.001 |
| <b>Triglycerides, mmol/l</b>                   | 1.13 [0.85, 1.40]                   | 1.62 [1.23, 2.12]                   | 1.73 [1.23, 2.33]         | <0.001 |
| <b>Alanine-aminotransferase, U/l</b>           | 23.00 [17.96, 33.00]                | 27.54 [20.36, 40.06]                | 31.00 [22.00, 46.86]      | <0.001 |
| <b>Aspartate-aminotransferase, U/l</b>         | 24.00 [21.56, 28.14]                | 26.35 [22.00, 33.27]                | 28.00 [22.75, 35.48]      | <0.001 |
| <b>γ-Glutamyltransferase, U/l</b>              | 27.00 [18.56, 37.00]                | 30.00 [22.00, 46.55]                | 37.00 [27.54, 58.34]      | <0.001 |
| <b>US-CRP, mg/dl</b>                           | 6.52 [3.22, 12.40]                  | 7.45 [4.50, 13.40]                  | 5.30 [2.75, 10.97]        | 0.004  |
| <b>hs-IL6, pg/ml</b>                           | 3.03 [2.03, 4.23]                   | 3.42 [2.46, 5.03]                   | 3.40 [2.15, 5.04]         | 0.032  |
| <b>CCCL2, pg/ml</b>                            | 86.55 [66.60, 107.78]               | 86.61 [66.42, 112.79]               | 84.56 [61.21, 110.92]     | 0.524  |
| <b>CXCL5, pg/ml</b>                            | 325.74 [122.81, 12.56 [5.73, 23.19] | 252.37 [110.15, 12.12 [5.43, 25.80] | 415.39 [131.15, 1087.94]  | 0.027  |
| <b>Eotaxine, pg/ml</b>                         | 12.56 [5.73, 23.19]                 | 12.12 [5.43, 25.80]                 | 17.35 [10.02, 29.23]      | 0.001  |
| <b>IL7, pg/ml</b>                              | 4.88 [2.92, 9.17]                   | 4.88 [2.72, 8.05]                   | 4.56 [2.53, 8.19]         | 0.680  |
| <b>IP10, pg/ml</b>                             | 27.19 [17.22, 42.79]                | 29.36 [17.11, 50.92]                | 29.63 [18.29, 48.09]      | 0.468  |
| <b>MIF, pg/ml</b>                              | 19.78 [5.93, 54.89]                 | 19.50 [5.08, 60.30]                 | 35.02 [7.57, 81.53]       | 0.003  |
| <b>MIP1b, pg/ml</b>                            | 66.92 [45.94, 90.72]                | 76.24 [49.84, 123.53]               | 76.28 [46.97, 112.83]     | 0.107  |
| <b>SDF1, pg/ml</b>                             | 159.08 [118.93, 743.06 [479.21,     | 164.86 [118.25, 850.31 [496.89,     | 156.67 [111.04, 224.24]   | 0.689  |
| <b>VEGF-A, pg/ml</b>                           | 743.06 [479.21,                     | 850.31 [496.89,                     | 746.95 [469.81, 1169.31]  | 0.389  |
| <b>sCD14, pg/ml</b>                            | 1341.28 [1154.64,                   | 1389.85 [1171.53,                   | 492.42 [1304.94, 1794.44] | <0.001 |
| <b>Bristol stool score</b>                     |                                     |                                     |                           | 0.140  |
| <b>Type 1,2</b>                                | 15 (9.3)                            | 10 (4.6)                            | 14 (6.1)                  |        |
| <b>Type 3,4</b>                                | 120 (74.5)                          | 160 (73.1)                          | 158 (69.3)                |        |
| <b>Type 5,6,7</b>                              | 26 (16.1)                           | 49 (22.4)                           | 56 (24.6)                 |        |
| <b>Antibiotic cures in last 5 y, n</b>         |                                     |                                     |                           | 0.966  |
| <b>0</b>                                       | 77 (47.8)                           | 102 (46.6)                          | 111 (48.7)                |        |
| <b>1</b>                                       | 31 (19.3)                           | 40 (18.3)                           | 42 (18.4)                 |        |
| <b>2</b>                                       | 17 (10.6)                           | 31 (14.2)                           | 26 (11.4)                 |        |
| <b>3+</b>                                      | 36 (22.4)                           | 46 (21.0)                           | 49 (21.5)                 |        |
| <b>Smoking status</b>                          |                                     |                                     |                           | 0.057  |
| <b>Ancient</b>                                 | 54 (34.0)                           | 81 (37.2)                           | 107 (47.8)                |        |
| <b>Current</b>                                 | 22 (13.8)                           | 39 (17.9)                           | 36 (16.1)                 |        |
| <b>No</b>                                      | 65 (40.9)                           | 76 (34.9)                           | 60 (26.8)                 |        |
| <b>Passive</b>                                 | 18 (11.3)                           | 22 (10.1)                           | 21 (9.4)                  |        |
| <b>Moderate-to-vigorous intensity leisure-</b> | 3.50 [1.12, 7.25]                   | 3.52 [1.22, 9.11]                   | 3.41 [0.58, 8.56]         | 0.780  |
| <b>Total physical activity excluding work,</b> | 80.56 [41.58, 143.33]               | 65.34 [36.07, 100.78]               | 63.69 [31.01, 106.48]     | 0.013  |
| <b>Manual/ heavy manual job (%)</b>            | 19 (12.1)                           | 33 (15.4)                           | 24 (11.2)                 | 0.402  |
| <b>Total leisure sedentary time, h/week</b>    | 30.00 [18.00, 43.00]                | 33.46 [20.00, 47.88]                | 29.50 [14.00, 47.00]      | 0.097  |
| <b>Total leisure screen time, h/week</b>       | 22.00 [14.00, 34.00]                | 23.00 [16.00, 37.69]                | 21.00 [11.81, 35.00]      | 0.084  |
| <b>Biotin intake, µg/day</b>                   | 26.34 [16.91, 40.71]                | 28.72 [16.62, 43.32]                | 31.19 [17.04, 57.28]      | 0.135  |

## Supplementary Table 2

|                                                    | NOB-MH                     | NOB-MUH                    | NOB-T2D                    | p      | MOB-MH                     | MOB-MUH                    | MOB-T2D                    | p      |
|----------------------------------------------------|----------------------------|----------------------------|----------------------------|--------|----------------------------|----------------------------|----------------------------|--------|
| n                                                  | 284                        | 130                        | 224                        |        | 13                         | 81                         | 205                        |        |
| Age, y                                             | 57.00 [49.00, 65.00]       | 65.00 [58.00, 68.75]       | 63.00 [58.00, 68.00]       | <0.001 | 59.00 [50.00, 66.00]       | 59.00 [54.00, 66.00]       | 62.00 [57.00, 67.00]       | 0.075  |
| Gender = Male                                      | 112 (39.4)                 | 72 (55.4)                  | 147 (65.6)                 | <0.001 | 6 (46.2)                   | 44 (54.3)                  | 97 (47.3)                  | 0.552  |
| Country                                            |                            |                            |                            | <0.001 |                            |                            |                            | <0.001 |
| Denmark                                            | 100 (35.2)                 | 88 (67.7)                  | 20 (8.9)                   |        | 4 (30.8)                   | 40 (49.4)                  | 16 (7.8)                   |        |
| France                                             | 93 (32.7)                  | 28 (21.5)                  | 113 (50.4)                 |        | 6 (46.2)                   | 38 (46.9)                  | 112 (54.6)                 |        |
| Germany                                            | 91 (32.0)                  | 14 (10.8)                  | 91 (40.6)                  |        | 3 (23.1)                   | 3 (3.7)                    | 77 (37.6)                  |        |
| Body mass index, kg/m <sup>2</sup>                 | 22.41 [21.21, 23.89]       | 26.51 [24.81, 28.30]       | 27.68 [26.56, 28.80]       | <0.001 | 32.84 [31.55, 33.91]       | 32.31 [31.21, 33.41]       | 32.21 [31.16, 33.31]       | 0.600  |
| % Body fat                                         | 24.77 [18.77, 30.54]       | 29.07 [25.74, 38.33]       | 28.23 [24.94, 37.18]       | <0.001 | 40.65 [34.90, 41.94]       | 39.06 [31.47, 44.47]       | 39.53 [31.41, 43.64]       | 0.912  |
| Waist circumference, cm                            | 79.30 [74.00, 86.00]       | 96.55 [89.50, 100.70]      | 99.00 [95.07, 104.03]      | <0.001 | 104.20 [100.20, 109.60]    | 107.20 [101.50, 113.30]    | 107.40 [103.00, 113.00]    | 0.353  |
| Systolic blood pressure, mm hg                     | 121.25 [111.50, 132.62]    | 135.50 [126.12, 144.88]    | 134.50 [125.00, 143.50]    | <0.001 | 133.50 [119.50, 145.00]    | 135.50 [125.00, 146.00]    | 134.00 [124.00, 145.00]    | 0.645  |
| Diastolic blood pressure, mm hg                    | 68.00 [63.00, 75.00]       | 76.50 [69.25, 81.50]       | 73.50 [66.50, 80.50]       | <0.001 | 76.00 [63.50, 79.00]       | 76.50 [69.50, 84.00]       | 75.00 [69.00, 82.00]       | 0.436  |
| Fasting blood glucose, mmol/l                      | 5.03 [4.70, 5.40]          | 5.70 [5.40, 6.10]          | 7.40 [6.10, 8.67]          | <0.001 | 5.40 [4.80, 5.50]          | 5.80 [5.30, 6.20]          | 7.40 [6.45, 8.70]          | <0.001 |
| HbA1c, %                                           | 5.41 [5.25, 5.60]          | 5.60 [5.40, 5.98]          | 6.80 [6.30, 7.44]          | <0.001 | 5.40 [5.30, 5.67]          | 5.70 [5.50, 6.00]          | 6.92 [6.44, 7.60]          | <0.001 |
| HDL cholesterol, mmol/l                            | 1.82 [1.43, 2.12]          | 1.27 [0.99, 1.54]          | 1.26 [1.06, 1.57]          | <0.001 | 1.32 [1.11, 1.68]          | 1.19 [0.94, 1.39]          | 1.19 [0.98, 1.46]          | 0.127  |
| LDL cholesterol, mmol/l                            | 3.10 [2.60, 3.70]          | 3.10 [2.60, 3.70]          | 2.76 [2.24, 3.39]          | <0.001 | 2.97 [2.58, 3.89]          | 3.02 [2.50, 3.70]          | 2.66 [2.11, 3.49]          | 0.012  |
| Triglycerides, mmol/l                              | 0.81 [0.62, 1.02]          | 1.31 [0.94, 1.92]          | 1.37 [0.98, 2.03]          | <0.001 | 1.04 [0.73, 1.30]          | 1.22 [0.93, 1.82]          | 1.49 [1.14, 2.03]          | <0.001 |
| Alanine-aminotransferase, U/l                      | 20.00 [16.00, 24.28]       | 29.00 [23.95, 35.75]       | 27.77 [21.42, 39.00]       | <0.001 | 28.00 [18.00, 36.00]       | 29.00 [25.50, 37.50]       | 31.00 [21.00, 45.00]       | 0.415  |
| Aspartate-aminotransferase, U/l                    | 25.75 [22.00, 30.00]       | 28.00 [25.00, 32.83]       | 27.00 [22.16, 34.00]       | <0.001 | 27.54 [20.00, 29.34]       | 29.00 [24.50, 34.00]       | 27.00 [22.75, 36.00]       | 0.258  |
| γ-Glutamyltransferase, U/l                         | 19.00 [14.00, 25.00]       | 30.00 [20.09, 45.75]       | 31.57 [22.75, 49.00]       | <0.001 | 22.75 [20.00, 31.00]       | 35.00 [23.00, 49.00]       | 38.00 [24.00, 54.00]       | 0.028  |
| US-CRP, mg/dl                                      | 0.83 [0.38, 1.68]          | 1.21 [0.66, 2.17]          | 1.60 [0.84, 3.64]          | <0.001 | 1.37 [0.85, 2.70]          | 1.88 [1.05, 3.66]          | 2.74 [1.46, 5.79]          | 0.009  |
| hs-IL6, pg/ml                                      | 1.13 [0.78, 1.87]          | 1.80 [1.28, 2.84]          | 1.81 [1.30, 2.75]          | <0.001 | 1.86 [1.09, 2.46]          | 2.37 [1.55, 3.25]          | 2.37 [1.65, 3.12]          | 0.395  |
| CCL2, pg/ml                                        | 81.62 [65.61, 105.21]      | 88.93 [69.70, 118.66]      | 81.60 [63.66, 110.56]      | 0.161  | 82.33 [76.52, 102.70]      | 89.27 [70.24, 108.03]      | 87.10 [61.46, 111.82]      | 0.624  |
| CXCL5, pg/ml                                       | 369.16 [121.00, 814.68]    | 505.44 [118.14, 1073.50]   | 493.68 [141.63, 1241.46]   | 0.078  | 381.70 [87.01, 869.27]     | 296.52 [101.11, 877.71]    | 597.08 [215.03, 1164.94]   | 0.011  |
| Eotaxine, pg/ml                                    | 22.26 [10.68, 39.41]       | 25.34 [11.08, 45.68]       | 23.62 [10.05, 43.31]       | 0.546  | 17.85 [6.56, 34.14]        | 15.89 [7.41, 32.09]        | 24.91 [10.75, 39.95]       | 0.045  |
| IL7, pg/ml                                         | 4.90 [2.68, 8.50]          | 5.63 [3.33, 9.70]          | 5.04 [2.27, 8.98]          | 0.17   | 5.33 [2.59, 7.98]          | 5.82 [3.18, 10.47]         | 4.40 [2.02, 7.79]          | 0.100  |
| IP10, pg/ml                                        | 21.09 [12.77, 32.12]       | 28.48 [16.95, 43.92]       | 21.91 [12.83, 36.34]       | <0.001 | 24.58 [14.65, 41.28]       | 29.15 [16.09, 42.77]       | 23.59 [15.81, 36.56]       | 0.410  |
| MIF, pg/ml                                         | 30.27 [8.88, 60.89]        | 41.09 [7.27, 81.31]        | 39.66 [8.07, 83.35]        | 0.063  | 14.36 [5.28, 57.86]        | 20.70 [7.78, 68.17]        | 42.45 [8.64, 75.93]        | 0.222  |
| MIP1b, pg/ml                                       | 60.04 [35.91, 104.12]      | 85.49 [45.70, 136.18]      | 67.57 [44.65, 106.71]      | 0.004  | 80.82 [59.22, 149.85]      | 67.44 [46.94, 107.18]      | 67.07 [40.10, 103.40]      | 0.211  |
| SDF1, pg/ml                                        | 141.69 [105.84, 195.66]    | 155.28 [117.66, 230.05]    | 151.59 [110.40, 196.88]    | 0.105  | 174.25 [167.31, 262.32]    | 151.18 [109.22, 207.46]    | 148.92 [113.42, 202.89]    | 0.044  |
| VEGF-A, pg/ml                                      | 726.28 [412.61, 1199.99]   | 824.95 [444.87, 1702.61]   | 707.89 [381.24, 1191.69]   | 0.071  | 1027.94 [418.85, 1717.71]  | 972.90 [472.26, 1403.22]   | 707.48 [405.85, 1255.46]   | 0.217  |
| sCD14, pg/ml                                       | 1484.06 [1242.28, 1777.89] | 1325.38 [1124.28, 1646.40] | 1520.13 [1303.39, 1746.86] | <0.001 | 1346.82 [1005.81, 1495.45] | 1378.59 [1107.56, 1641.51] | 1443.02 [1198.48, 1670.25] | 0.145  |
| Bristol stool score                                |                            |                            |                            | 0.059  |                            |                            |                            | 0.212  |
| Type 1,2                                           | 39 (13.7)                  | 15 (11.5)                  | 18 (8.0)                   |        | 2 (15.4)                   | 10 (12.3)                  | 19 (9.3)                   |        |
| Type 3,4                                           | 218 (76.8)                 | 98 (75.4)                  | 168 (75.0)                 |        | 10 (76.9)                  | 65 (80.2)                  | 150 (73.2)                 |        |
| Type 5,6,7                                         | 27 (9.5)                   | 17 (13.1)                  | 38 (17.0)                  |        | 1 (7.7)                    | 6 (7.4)                    | 36 (17.6)                  |        |
| Antibiotic cures in last 5 y, n                    |                            |                            |                            | 0.001  |                            |                            |                            | 0.066  |
| 0                                                  | 168 (59.2)                 | 83 (63.8)                  | 152 (67.9)                 |        | 10 (76.9)                  | 43 (53.1)                  | 133 (64.9)                 |        |
| 1                                                  | 62 (21.8)                  | 39 (30.0)                  | 40 (17.9)                  |        | 3 (23.1)                   | 27 (33.3)                  | 38 (18.5)                  |        |
| 2                                                  | 34 (12.0)                  | 7 (5.4)                    | 13 (5.8)                   |        | 0 (0.0)                    | 7 (8.6)                    | 13 (6.3)                   |        |
| 3+                                                 | 20 (7.0)                   | 1 (0.8)                    | 19 (8.5)                   |        | 0 (0.0)                    | 4 (4.9)                    | 21 (10.2)                  |        |
| Smoking status                                     |                            |                            |                            | <0.001 |                            |                            |                            | 0.603  |
| Ancient                                            | 99 (34.9)                  | 63 (48.5)                  | 102 (46.2)                 |        | 5 (38.5)                   | 37 (45.7)                  | 89 (43.4)                  |        |
| Current                                            | 27 (9.5)                   | 18 (13.8)                  | 28 (12.7)                  |        | 3 (23.1)                   | 6 (7.4)                    | 21 (10.2)                  |        |
| No                                                 | 149 (52.5)                 | 43 (33.1)                  | 73 (33.0)                  |        | 4 (30.8)                   | 34 (42.0)                  | 77 (37.6)                  |        |
| Passive                                            | 9 (3.2)                    | 6 (4.6)                    | 18 (8.1)                   |        | 1 (7.7)                    | 4 (4.9)                    | 18 (8.8)                   |        |
| Moderate-to-vigorous intensity leisure-time        | 7.69 [4.25, 13.67]         | 8.50 [4.39, 13.99]         | 6.55 [1.19, 14.62]         | 0.057  | 4.06 [1.25, 10.25]         | 4.86 [1.82, 8.14]          | 4.53 [0.62, 11.25]         | 0.888  |
| Total physical activity excluding work, MET-h/week | 87.54 [56.40, 126.33]      | 91.86 [53.20, 141.52]      | 82.42 [45.44, 144.60]      | 0.553  | 83.54 [39.56, 149.67]      | 77.72 [42.18, 130.50]      | 69.15 [38.85, 123.27]      | 0.640  |
| Manual/ heavy manual job (%)                       | 33 (11.9)                  | 9 (7.0)                    | 24 (11.5)                  | 0.306  | 2 (15.4)                   | 7 (8.8)                    | 24 (12.2)                  | 0.625  |
| Total leisure sedentary time, h/week               | 24.00 [14.00, 35.50]       | 20.50 [11.00, 35.75]       | 20.00 [11.63, 35.00]       | 0.078  | 20.50 [14.00, 40.00]       | 29.42 [17.12, 42.46]       | 24.83 [12.00, 39.00]       | 0.141  |
| Total leisure screen time, h/week                  | 18.00 [9.25, 28.00]        | 16.00 [8.00, 27.62]        | 16.00 [8.00, 27.00]        | 0.192  | 16.00 [8.50, 32.00]        | 23.75 [12.75, 35.00]       | 17.50 [8.00, 31.00]        | 0.038  |
| Biotin intake, µg/day                              | 32.4 [24.9;43.2]           | 35.1 [27.2;45.9]           | 36.2 [23.3;53.6]           | 0.161  | 39.7 [23.4;54.4]           | 29.8 [22.7;36.9]           | 35.9 [25.8;50.1]           | 0.011  |

## Supplementary Table S3

|                                         | NON-SOB-MH  | NON-SOB-MUH | NON-SOB-T2D | SOB-MH      | SOB-MUH     | SOB-T2D     |
|-----------------------------------------|-------------|-------------|-------------|-------------|-------------|-------------|
| <b>n</b>                                | 297         | 211         | 429         | 161         | 219         | 228         |
| <b>Number of lipid-lowering drugs</b>   |             |             |             |             |             |             |
| 0                                       | 286 (96.3)  | 132 (62.6)  | 230 (53.6)  | 161 (100.0) | 192 (87.7)  | 146 (64.0)  |
| 1                                       | 11 (3.7)    | 69 (32.7)   | 183 (42.7)  | 0 (0.0)     | 26 (11.9)   | 74 (32.5)   |
| 2                                       | 0 (0.0)     | 10 (4.7)    | 16 (3.7)    | 0 (0.0)     | 1 (0.5)     | 8 (3.5)     |
| <b>Specific lipid-lowering drugs</b>    |             |             |             |             |             |             |
| Ezetimibe                               | 0 (0.0)     | 14 (6.6)    | 16 (3.7)    | 0 (0.0)     | 2 (0.9)     | 8 (3.5)     |
| Fibrates                                | 0 (0.0)     | 4 (1.9)     | 16 (3.7)    | 0 (0.0)     | 2 (0.9)     | 7 (3.1)     |
| Statins                                 | 11 (3.7)    | 71 (33.6)   | 183 (42.7)  | 0 (0.0)     | 24 (11.0)   | 75 (32.9)   |
| <b>Number of antihypertensive drugs</b> |             |             |             |             |             |             |
| 0                                       | 270 (90.9)  | 99 (46.9)   | 139 (32.4)  | 114 (70.8)  | 99 (45.2)   | 68 (29.8)   |
| 1                                       | 25 (8.4)    | 48 (22.7)   | 82 (19.1)   | 23 (14.3)   | 48 (21.9)   | 36 (15.8)   |
| 2                                       | 2 (0.7)     | 44 (20.9)   | 106 (24.7)  | 18 (11.2)   | 30 (13.7)   | 43 (18.9)   |
| 3                                       | 0 (0.0)     | 15 (7.1)    | 63 (14.7)   | 5 (3.1)     | 32 (14.6)   | 39 (17.1)   |
| 4                                       | 0 (0.0)     | 2 (0.9)     | 27 (6.3)    | 1 (0.6)     | 6 (2.7)     | 28 (12.3)   |
| 5                                       | 0 (0.0)     | 1 (0.5)     | 11 (2.6)    | 0 (0.0)     | 3 (1.4)     | 14 (6.1)    |
| 6                                       | 0 (0.0)     | 2 (0.9)     | 1 (0.2)     | 0 (0.0)     | 1 (0.5)     | 0 (0.0)     |
| <b>Specific antihypertensive drugs</b>  |             |             |             |             |             |             |
| ACE inhibitors                          | 4 (1.3)     | 28 (13.3)   | 102 (23.8)  | 13 (8.1)    | 43 (19.6)   | 67 (29.4)   |
| Renin antagonists                       | 297 (100.0) | 211 (100.0) | 429 (100.0) | 161 (100.0) | 219 (100.0) | 228 (100.0) |
| Thiazides                               | 3 (1.0)     | 44 (20.9)   | 127 (29.6)  | 18 (11.2)   | 49 (22.4)   | 83 (36.4)   |
| Angiotensin II receptor blockers        | 5 (1.7)     | 48 (22.7)   | 144 (33.6)  | 20 (12.4)   | 48 (21.9)   | 71 (31.1)   |
| Beta blockers                           | 14 (4.7)    | 27 (12.8)   | 114 (26.6)  | 10 (6.2)    | 47 (21.5)   | 78 (34.2)   |
| Calcium channel blockers                | 2 (0.7)     | 42 (19.9)   | 123 (28.7)  | 9 (5.6)     | 35 (16.0)   | 63 (27.6)   |
| Central blockers                        | 0 (0.0)     | 2 (0.9)     | 14 (3.3)    | 2 (1.2)     | 6 (2.7)     | 11 (4.8)    |
| Loop diuretics                          | 0 (0.0)     | 0 (0.0)     | 14 (3.3)    | 4 (2.5)     | 14 (6.4)    | 35 (15.4)   |
| K-sparing diuretics                     | 1 (0.3)     | 15 (7.1)    | 14 (3.3)    | 2 (1.2)     | 7 (3.2)     | 13 (5.7)    |
| <b>Number of antidiabetic drugs</b>     |             |             |             |             |             |             |
| 0                                       | 297 (100.0) | 211 (100.0) | 40 (9.3)    | 161 (100.0) | 219 (100.0) | 57 (25.0)   |
| 1                                       | 0 (0.0)     | 0 (0.0)     | 95 (22.1)   | 0 (0.0)     | 0 (0.0)     | 41 (18.0)   |
| 2                                       | 0 (0.0)     | 0 (0.0)     | 178 (41.5)  | 0 (0.0)     | 0 (0.0)     | 66 (28.9)   |
| 3                                       | 0 (0.0)     | 0 (0.0)     | 70 (16.3)   | 0 (0.0)     | 0 (0.0)     | 27 (11.8)   |
| 4                                       | 0 (0.0)     | 0 (0.0)     | 42 (9.8)    | 0 (0.0)     | 0 (0.0)     | 30 (13.2)   |
| 5                                       | 0 (0.0)     | 0 (0.0)     | 4 (0.9)     | 0 (0.0)     | 0 (0.0)     | 7 (3.1)     |
| <b>Specific antidiabetic drugs</b>      |             |             |             |             |             |             |
| Metformin                               | 0 (0.0)     | 0 (0.0)     | 337 (78.6)  | 0 (0.0)     | 0 (0.0)     | 143 (62.7)  |
| Glitazones                              | 0 (0.0)     | 0 (0.0)     | 1 (0.2)     | 0 (0.0)     | 0 (0.0)     | 1 (0.4)     |
| DPP IV inhibitors                       | 0 (0.0)     | 0 (0.0)     | 221 (51.5)  | 0 (0.0)     | 0 (0.0)     | 96 (42.1)   |
| Sulfonylurea                            | 0 (0.0)     | 0 (0.0)     | 117 (27.3)  | 0 (0.0)     | 0 (0.0)     | 29 (12.7)   |
| SGLT2 inhibitors                        | 0 (0.0)     | 0 (0.0)     | 3 (0.7)     | 0 (0.0)     | 0 (0.0)     | 7 (3.1)     |
| GPL-1 receptor agonists                 | 0 (0.0)     | 0 (0.0)     | 26 (6.1)    | 0 (0.0)     | 0 (0.0)     | 34 (14.9)   |
| Acarbose                                | 0 (0.0)     | 0 (0.0)     | 2 (0.5)     | 0 (0.0)     | 0 (0.0)     | 0 (0.0)     |
| Insulin                                 | 0 (0.0)     | 0 (0.0)     | 93 (21.7)   | 0 (0.0)     | 0 (0.0)     | 59 (25.9)   |
| <b>Other drugs</b>                      |             |             |             |             |             |             |
| Aspirin                                 | 4 (1.3)     | 28 (13.3)   | 85 (19.8)   | 2 (1.2)     | 9 (4.1)     | 40 (17.5)   |
| Proton pump inhibitors                  | 8 (2.7)     | 21 (10.0)   | 68 (15.9)   | 17 (10.6)   | 38 (17.4)   | 39 (17.1)   |

## Supplementary Table S4

|                                                        | Overall       | NOB-T2D    | MOB-T2D    | SOB-T2D    | p      |
|--------------------------------------------------------|---------------|------------|------------|------------|--------|
| <b>n</b>                                               | 657           | 224        | 205        | 228        |        |
| <b>No metformin treatment</b>                          | 177<br>(26.9) | 51 (22.8)  | 41 (20.0)  | 85 (37.3)  | <0.001 |
| No antidiabetic treatment                              | 97 (14.8)     | 22 (9.8)   | 18 (8.8)   | 57 (25.0)  | <0.001 |
| Insulin only                                           | 35 (5.3)      | 13 (5.8)   | 12 (5.9)   | 10 (4.4)   | 0.736  |
| Sulfonylurea only                                      | 11 (1.7)      | 7 (3.1)    | 3 (1.5)    | 1 (0.4)    | 0.070  |
| Other single treatments (excluding Metformin)          | 17 (2.6)      | 4 (1.8)    | 3 (1.5)    | 10 (4.4)   | 0.104  |
| Other treatment combinations (excluding Metformin)     | 17 (2.6)      | 5 (2.2)    | 5 (2.4)    | 7 (3.1)    | 0.866  |
| <b>Any treatment (combination) including Metformin</b> | 480<br>(73.1) | 173 (77.2) | 164 (80.0) | 143 (62.7) | <0.001 |
| Metformin only                                         | 100<br>(15.2) | 37 (16.5)  | 35 (17.1)  | 28 (12.3)  | 0.307  |
| Metformin + DPP IV inhibitors                          | 105<br>(16.1) | 69 (30.8)  | 52 (25.4)  | 44 (19.3)  | 0.019  |
| Metformin + Sulfonylurea                               | 34 (5.2)      | 16 (7.1)   | 10 (4.9)   | 8 (3.5)    | 0.213  |
| Metformin + Insulin                                    | 14 (2.1)      | 2 (0.9)    | 6 (2.9)    | 6 (2.6)    | 0.285  |
| Metformin + DPP IV inhibitors + Insulin                | 43 (6.5)      | 10 (4.5)   | 14 (6.8)   | 19 (8.3)   | 0.246  |
| Metformin + DPP IV inhibitors + Sulfonylurea           | 45 (6.8)      | 20 (8.9)   | 21 (10.2)  | 4 (1.8)    | 0.001  |
| Metformin + DPP IV inhibitors + Sulfonylurea + Insulin | 19 (2.9)      | 9 (4.0)    | 7 (3.4)    | 3 (1.3)    | 0.199  |
| Metformin + GLP-1 receptor antagonists + Sulfonylurea  | 12 (1.8)      | 3 (1.3)    | 3 (1.5)    | 6 (2.6)    | 0.620  |
| Other combinations of treatments including Metformin   | 48 (7.3)      | 7 (3.1)    | 16 (7.8)   | 25 (11.0)  | 0.006  |
