# Supplementary material for: Impairment of gut microbial biotin metabolism and host biotin status in severe obesity: effect of biotin and prebiotic supplementation on improved metabolism
Source: PubMed Central journal article supplement — Gut. 2022 Jan 11;71(12):2463–80. doi: 10.1136/gutjnl-2021-325753 (PMC9664128; doi:10.1136/gutjnl-2021-325753), 2022-01-11
Supplement: gutjnl-2021-325753supp005.pdf [file gutjnl-2021-325753supp005.pdf]

T2D group; Metf- (n=177)  
Chi-square pval=0.0076

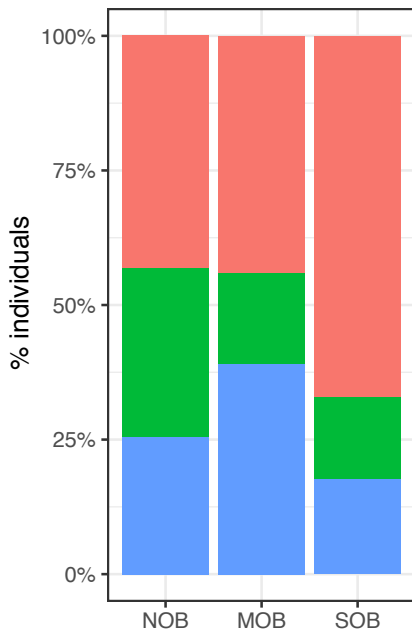

T2D group; Metf+ (n=480)  
Chi-square pval=0.019

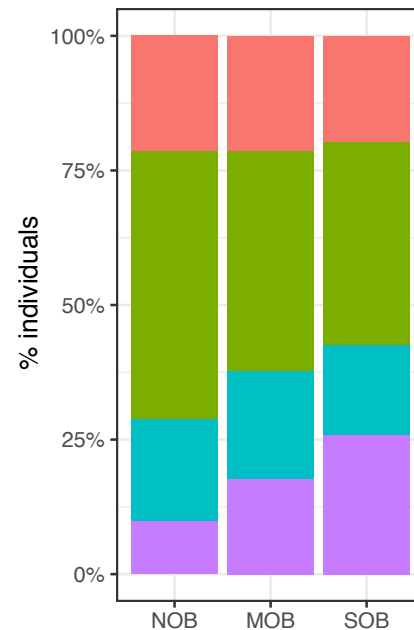

Number antidiabetic treatments  
0 1 2+3

Number antidiabetic treatments  
1 2 3 4+5
