# Supplementary material for: Impairment of gut microbial biotin metabolism and host biotin status in severe obesity: effect of biotin and prebiotic supplementation on improved metabolism
Source: HighWire-hosted journal article supplement (doi:10.1136/gutjnl-2021-325753), 2022-01-11
Supplement: gutjnl-2021-325753supp005_data_supplement.pdf [file gutjnl-2021-325753supp005_data_supplement.pdf]

T2D group; Metf- (n=177)  
Chi-square pval=0.0076

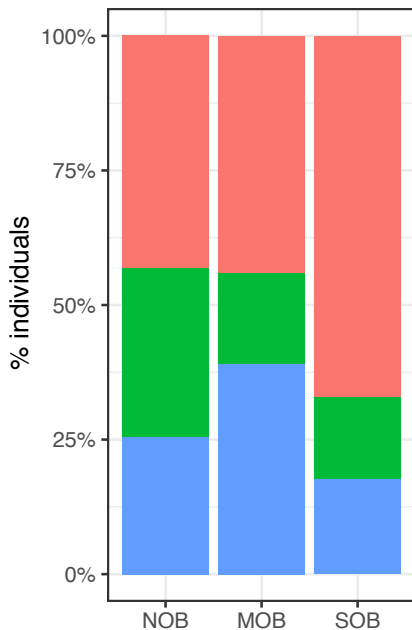

T2D group; Metf+ (n=480)  
Chi-square pval=0.019

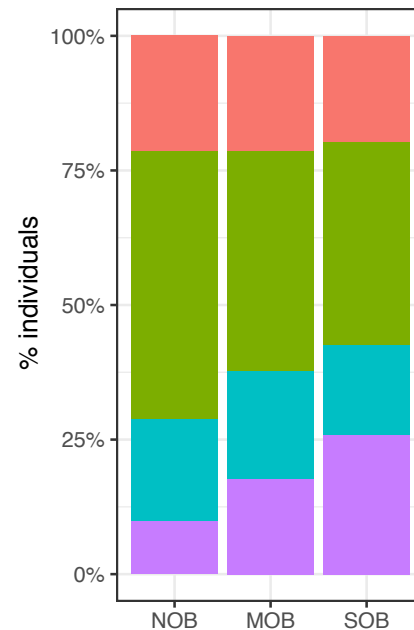

Number antidiabetic treatments  
0 1 2+3

Number antidiabetic treatments  
1 2 3 4+5
