# Supplementary material for: Impairment of gut microbial biotin metabolism and host biotin status in severe obesity: effect of biotin and prebiotic supplementation on improved metabolism
Source: HighWire-hosted journal article supplement (doi:10.1136/gutjnl-2021-325753), 2022-01-11

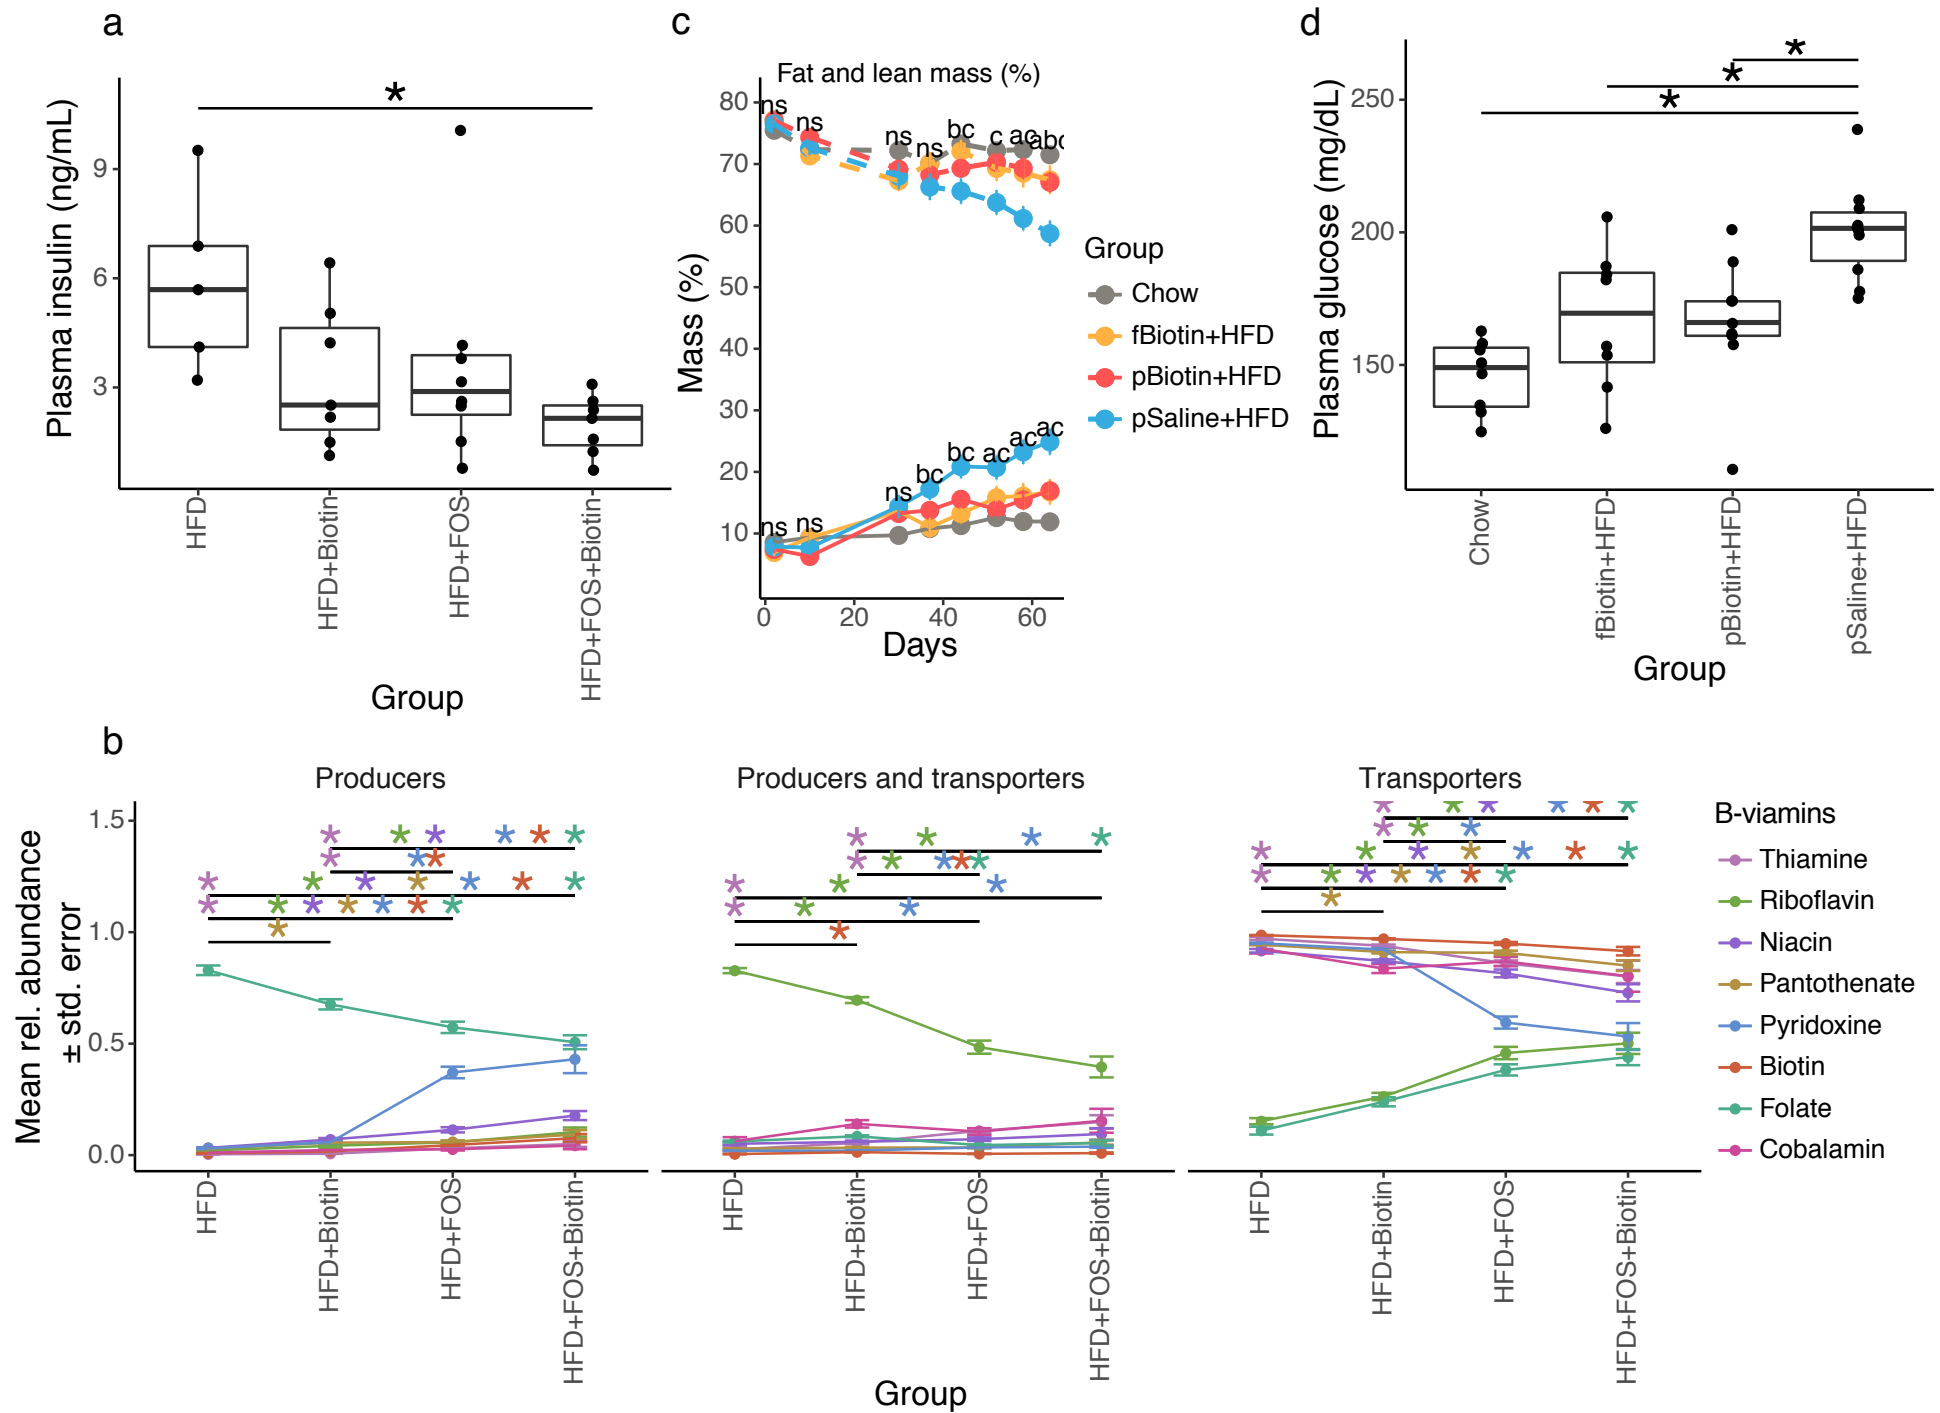

Supplement: gutjnl-2021-325753supp011_data_supplement.pdf [file gutjnl-2021-325753supp011_data_supplement.pdf]
