# Supplementary figures and images for: Impairment of gut microbial biotin metabolism and host biotin status in severe obesity: effect of biotin and prebiotic supplementation on improved metabolism
Source: PubMed Central journal article supplement — Gut. 2022 Jan 11;71(12):2463–80. doi: 10.1136/gutjnl-2021-325753 (PMC9664128; doi:10.1136/gutjnl-2021-325753), 2022-01-11

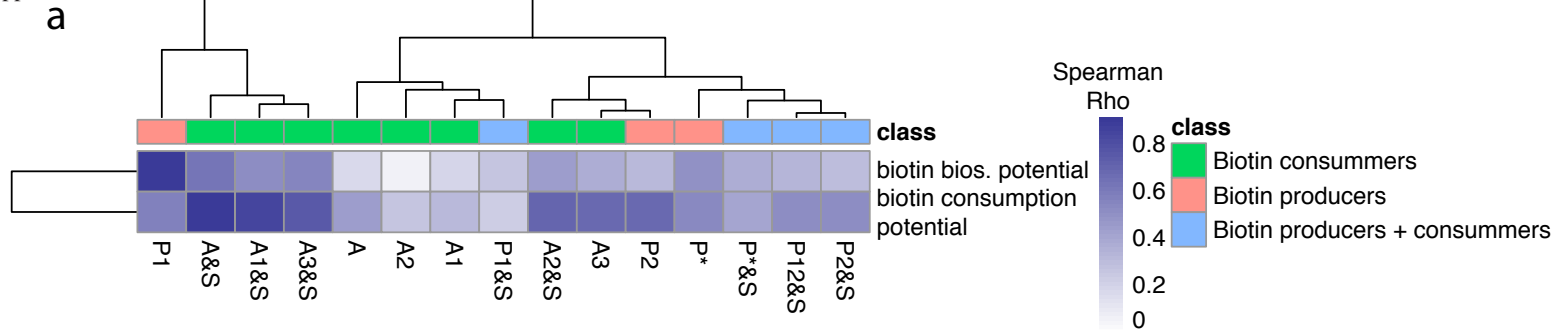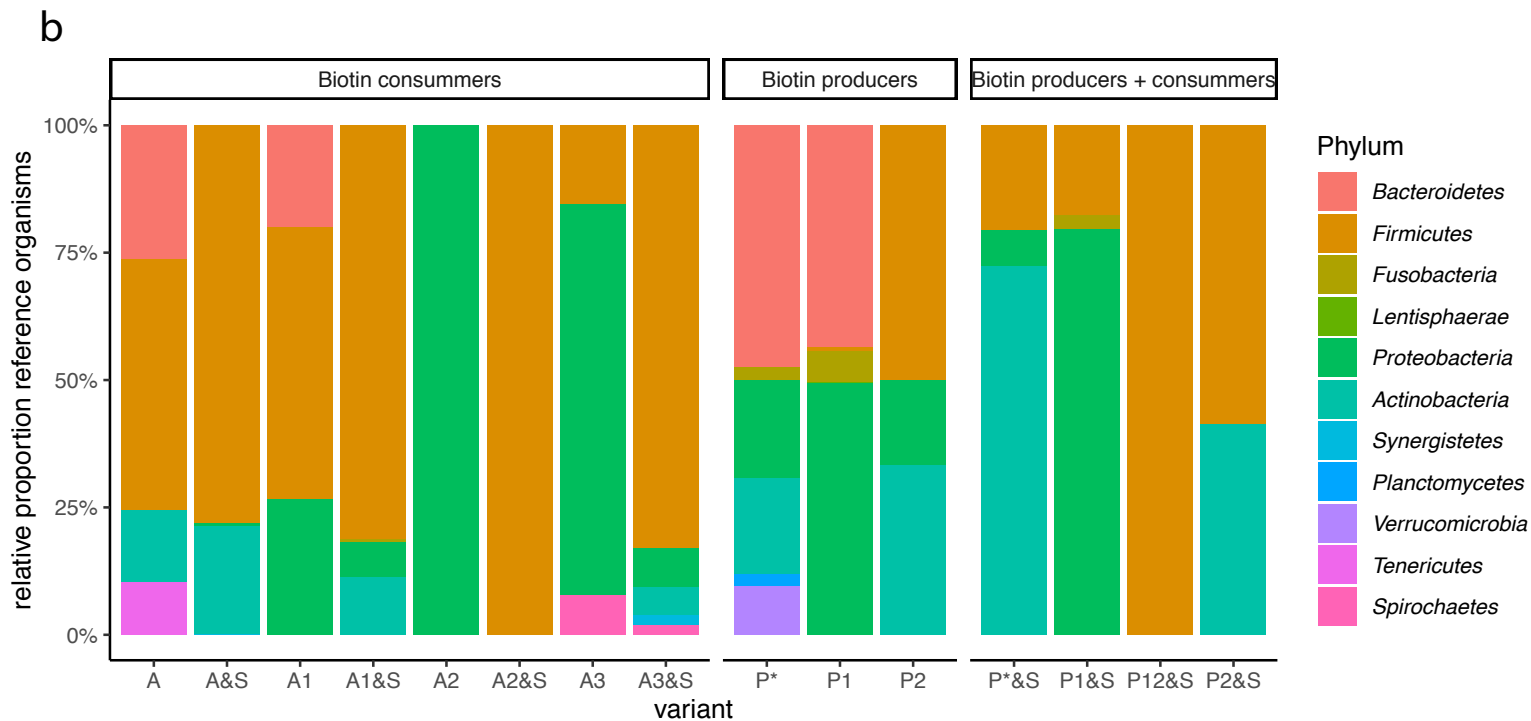

Supplement: gutjnl-2021-325753supp006.pdf [file gutjnl-2021-325753supp006.pdf]

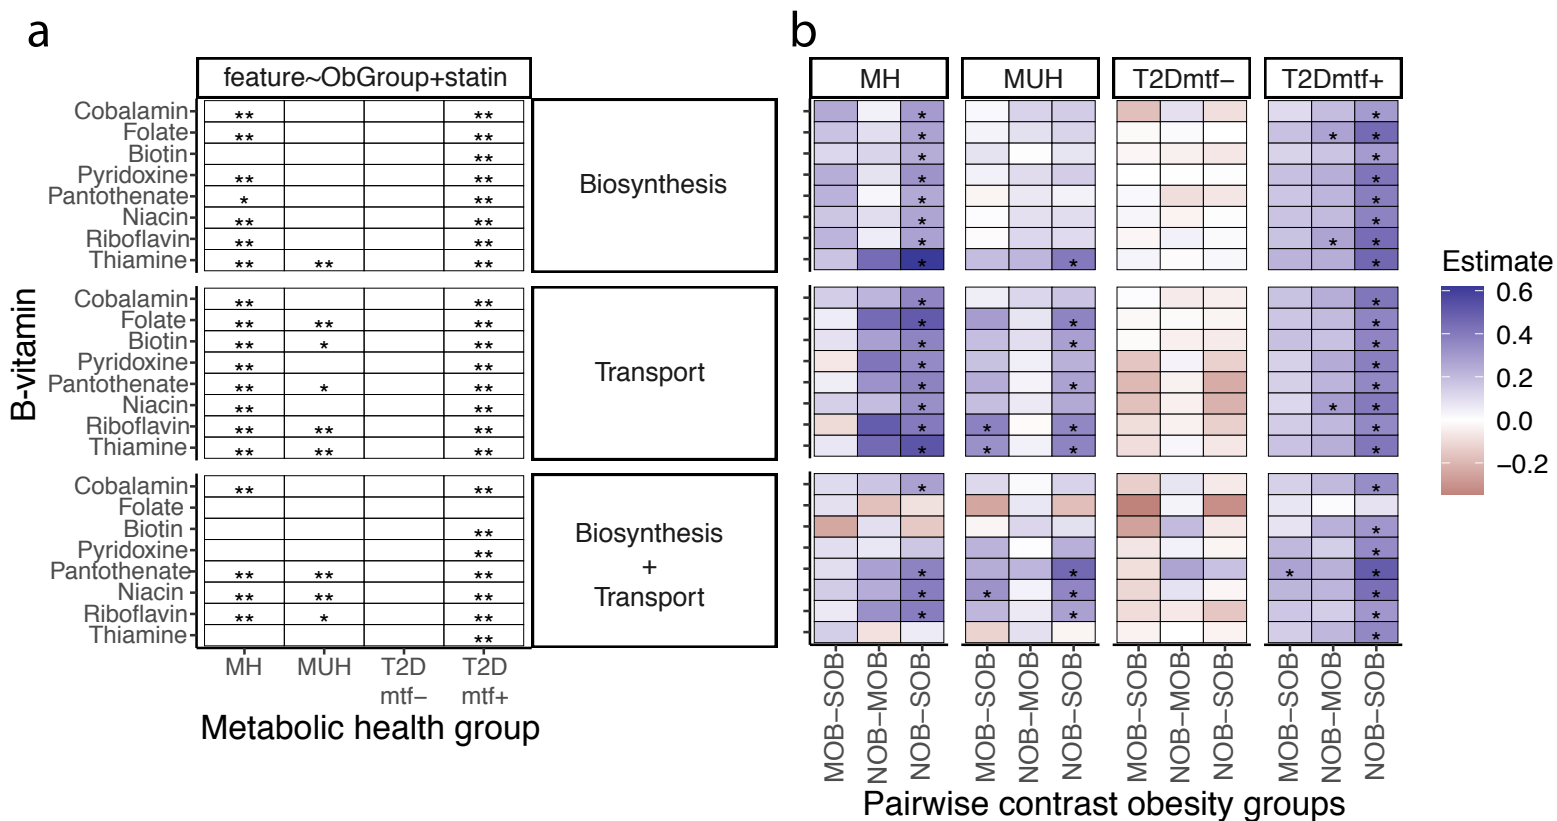

Supplement: gutjnl-2021-325753supp007.pdf [file gutjnl-2021-325753supp007.pdf]

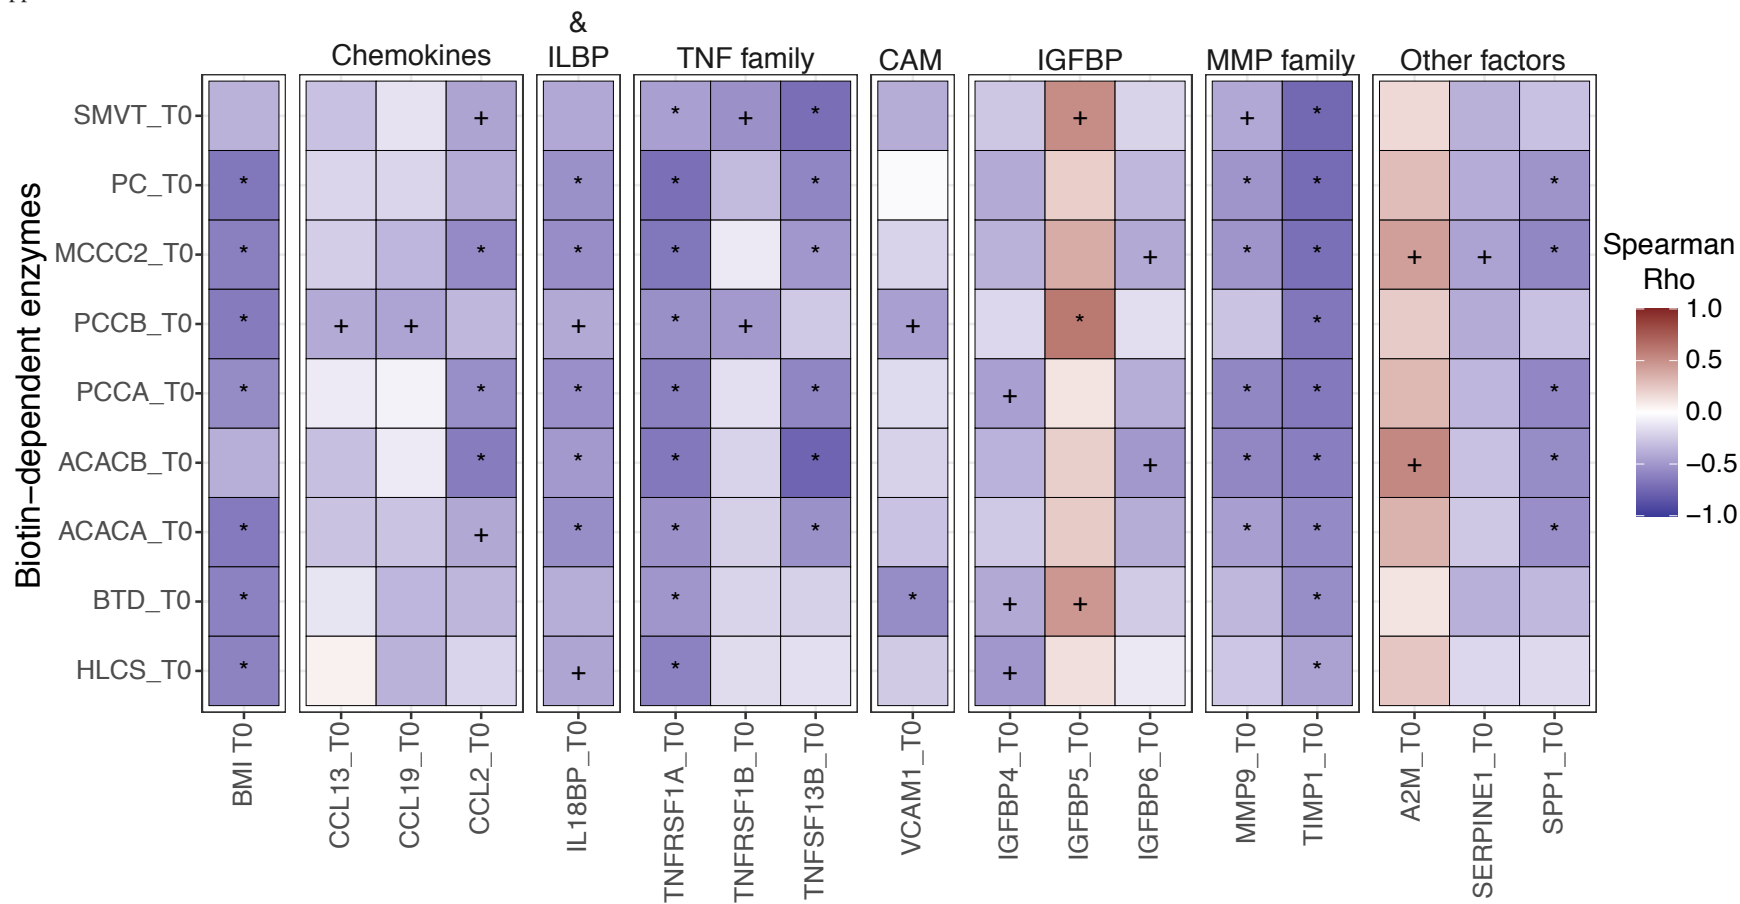

Supplement: gutjnl-2021-325753supp008.pdf [file gutjnl-2021-325753supp008.pdf]

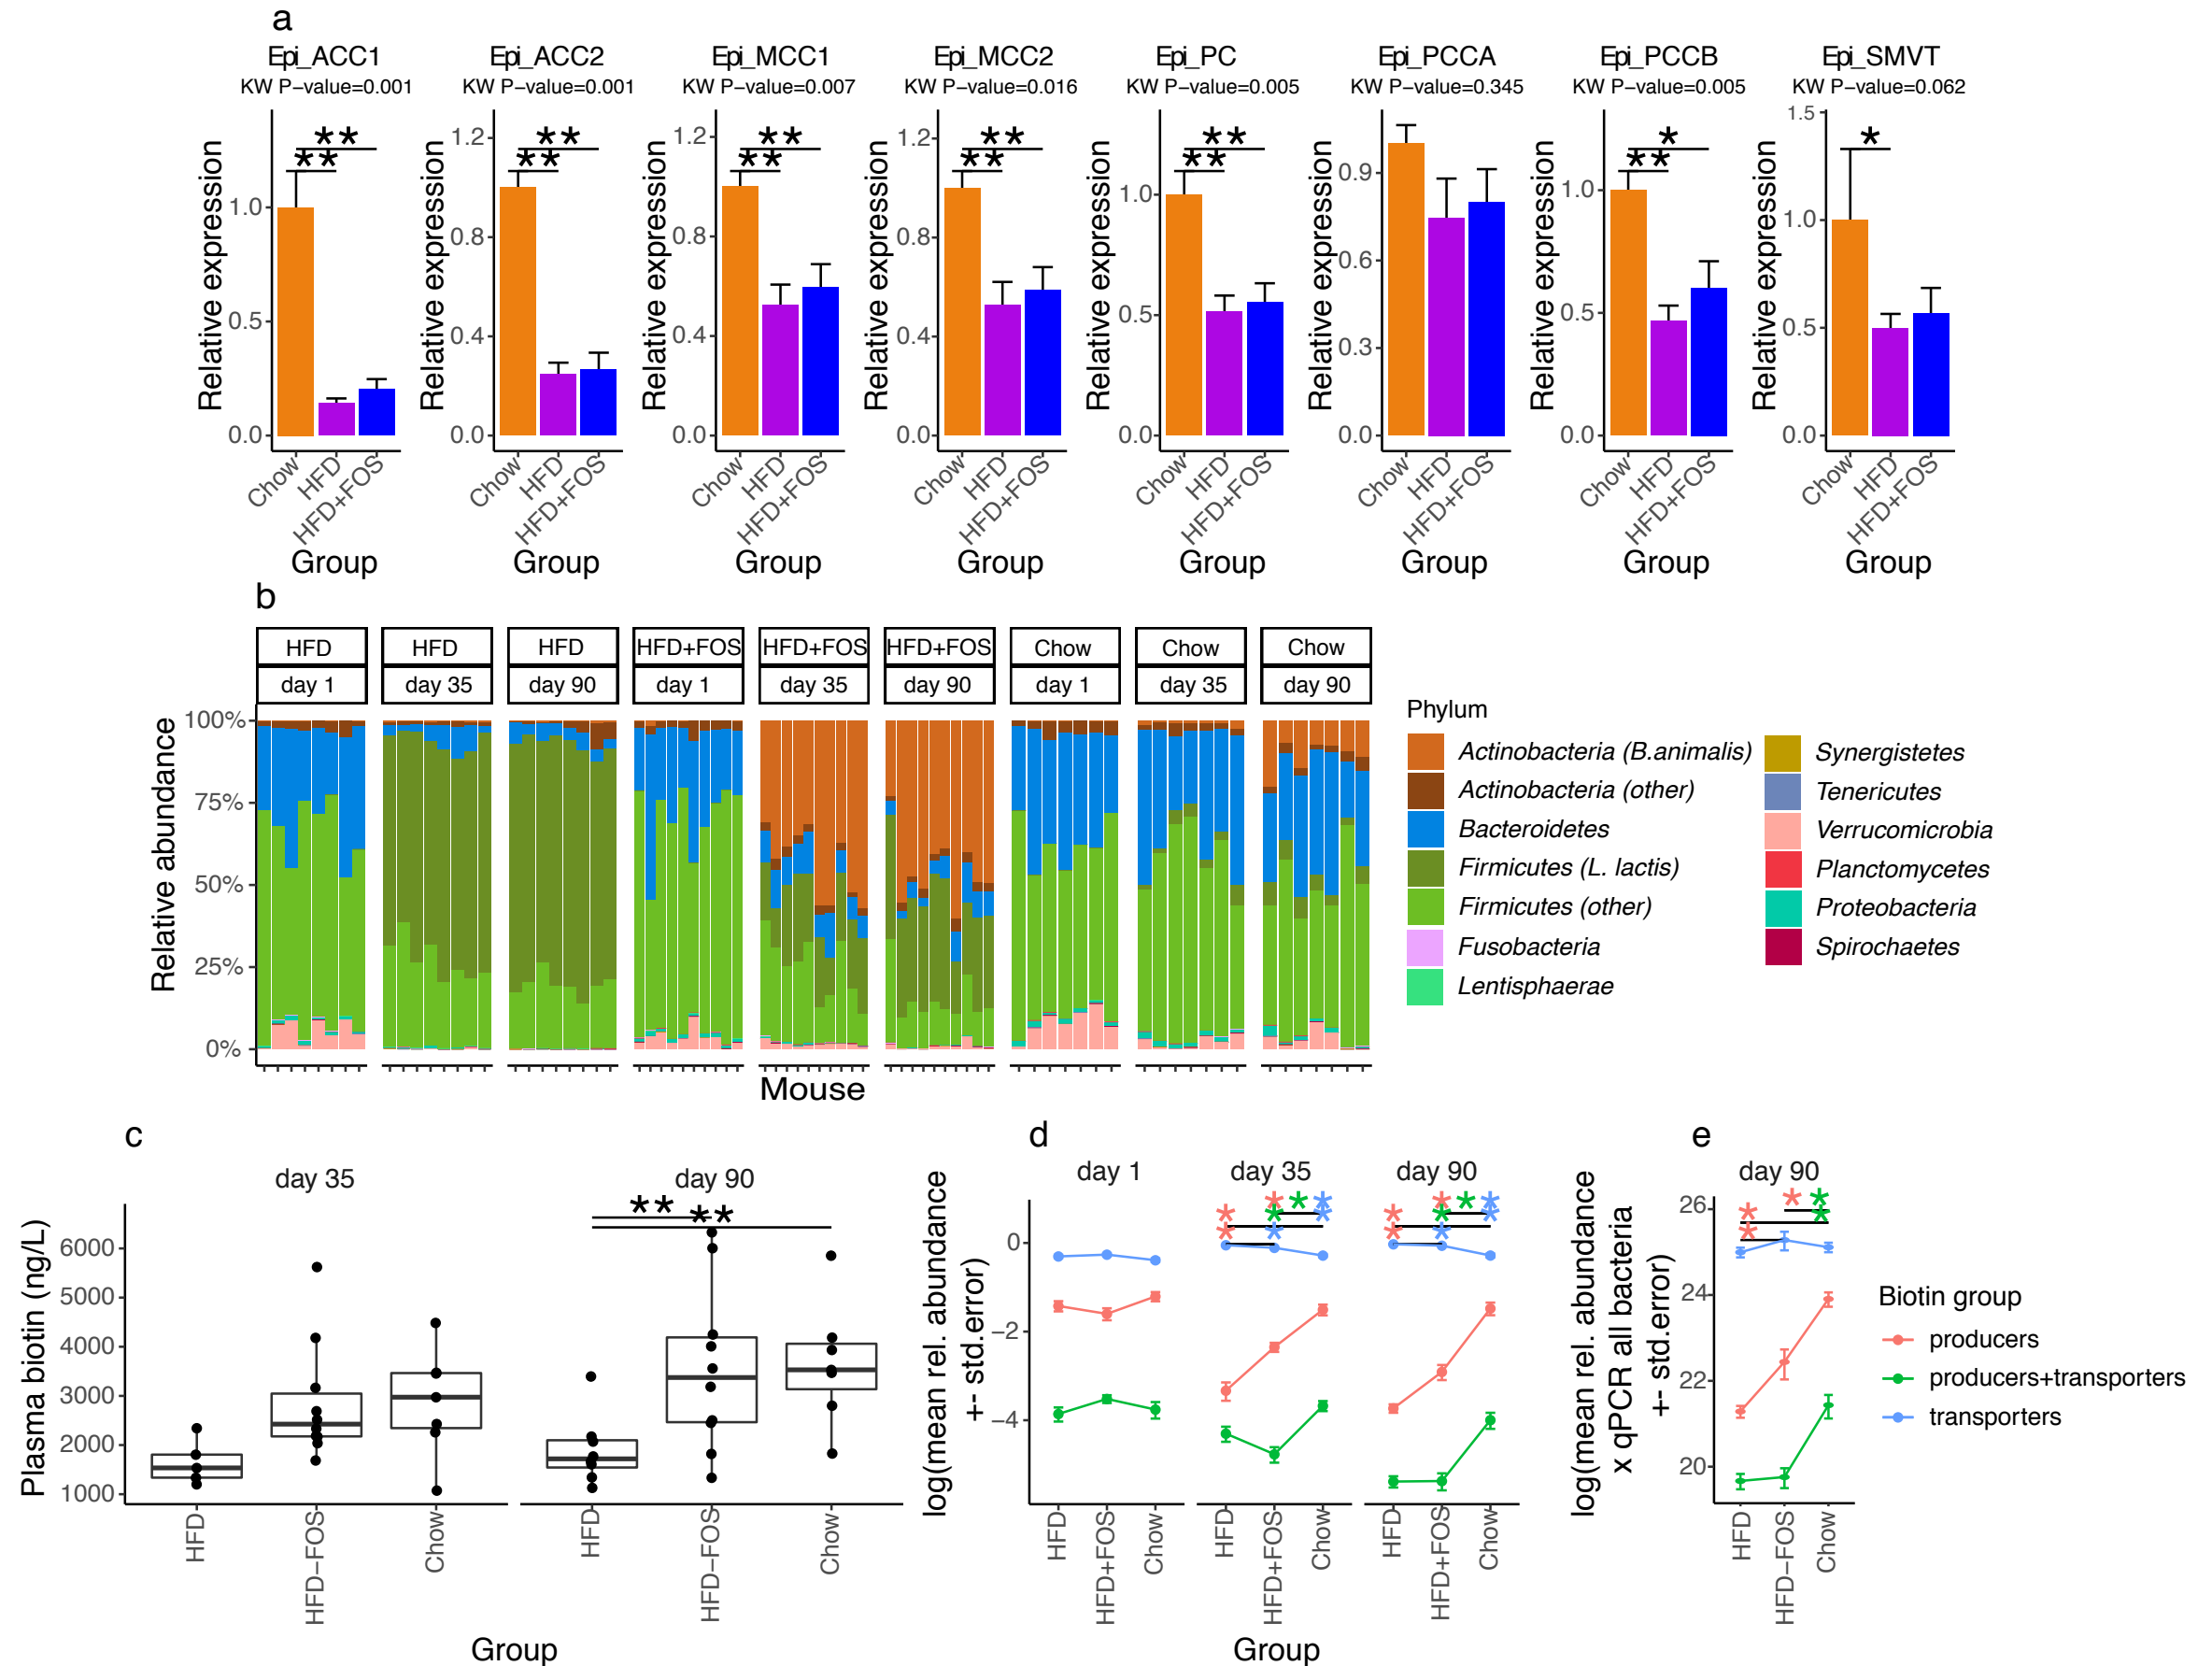

Supplement: gutjnl-2021-325753supp009.pdf [file gutjnl-2021-325753supp009.pdf]

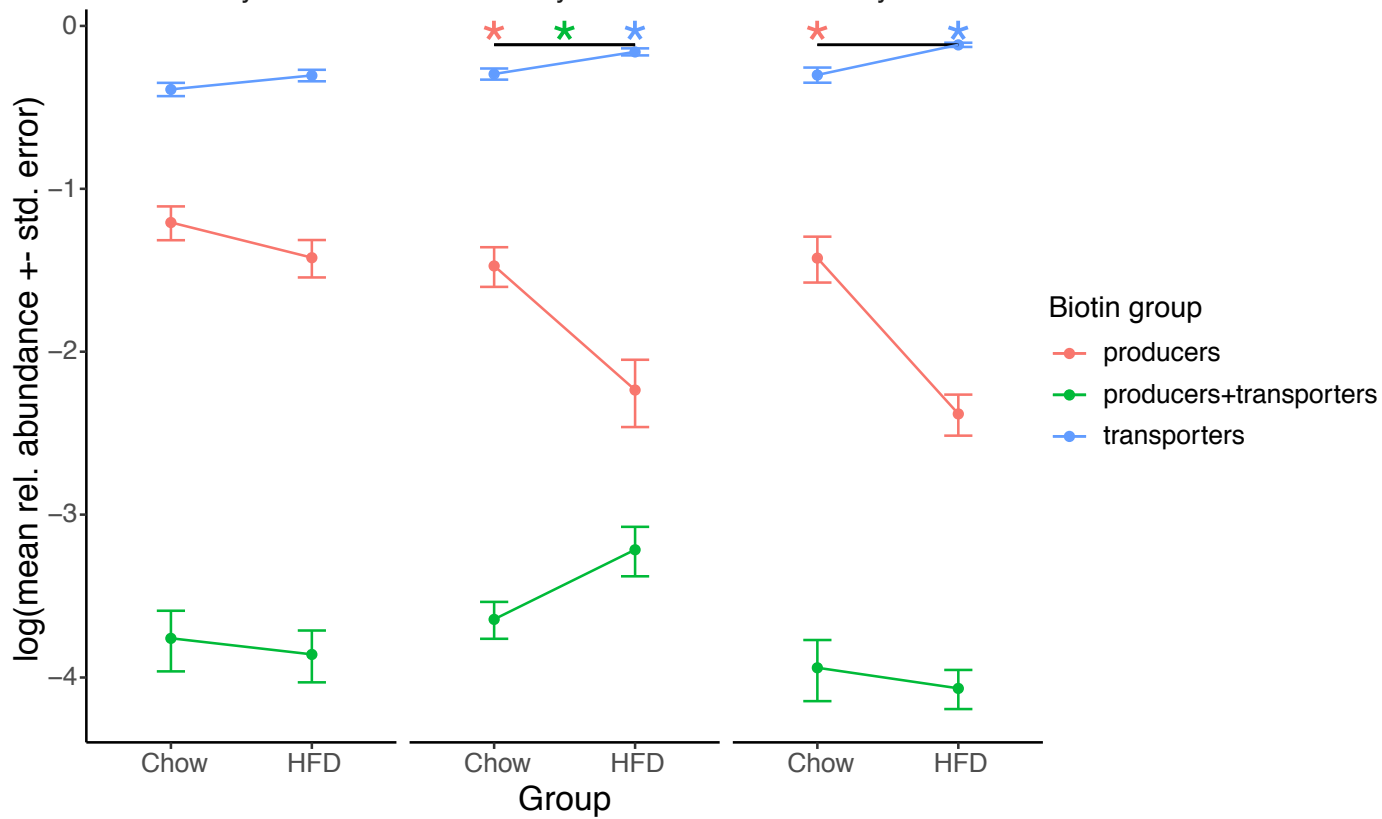

Supplement: gutjnl-2021-325753supp010.pdf [file gutjnl-2021-325753supp010.pdf]

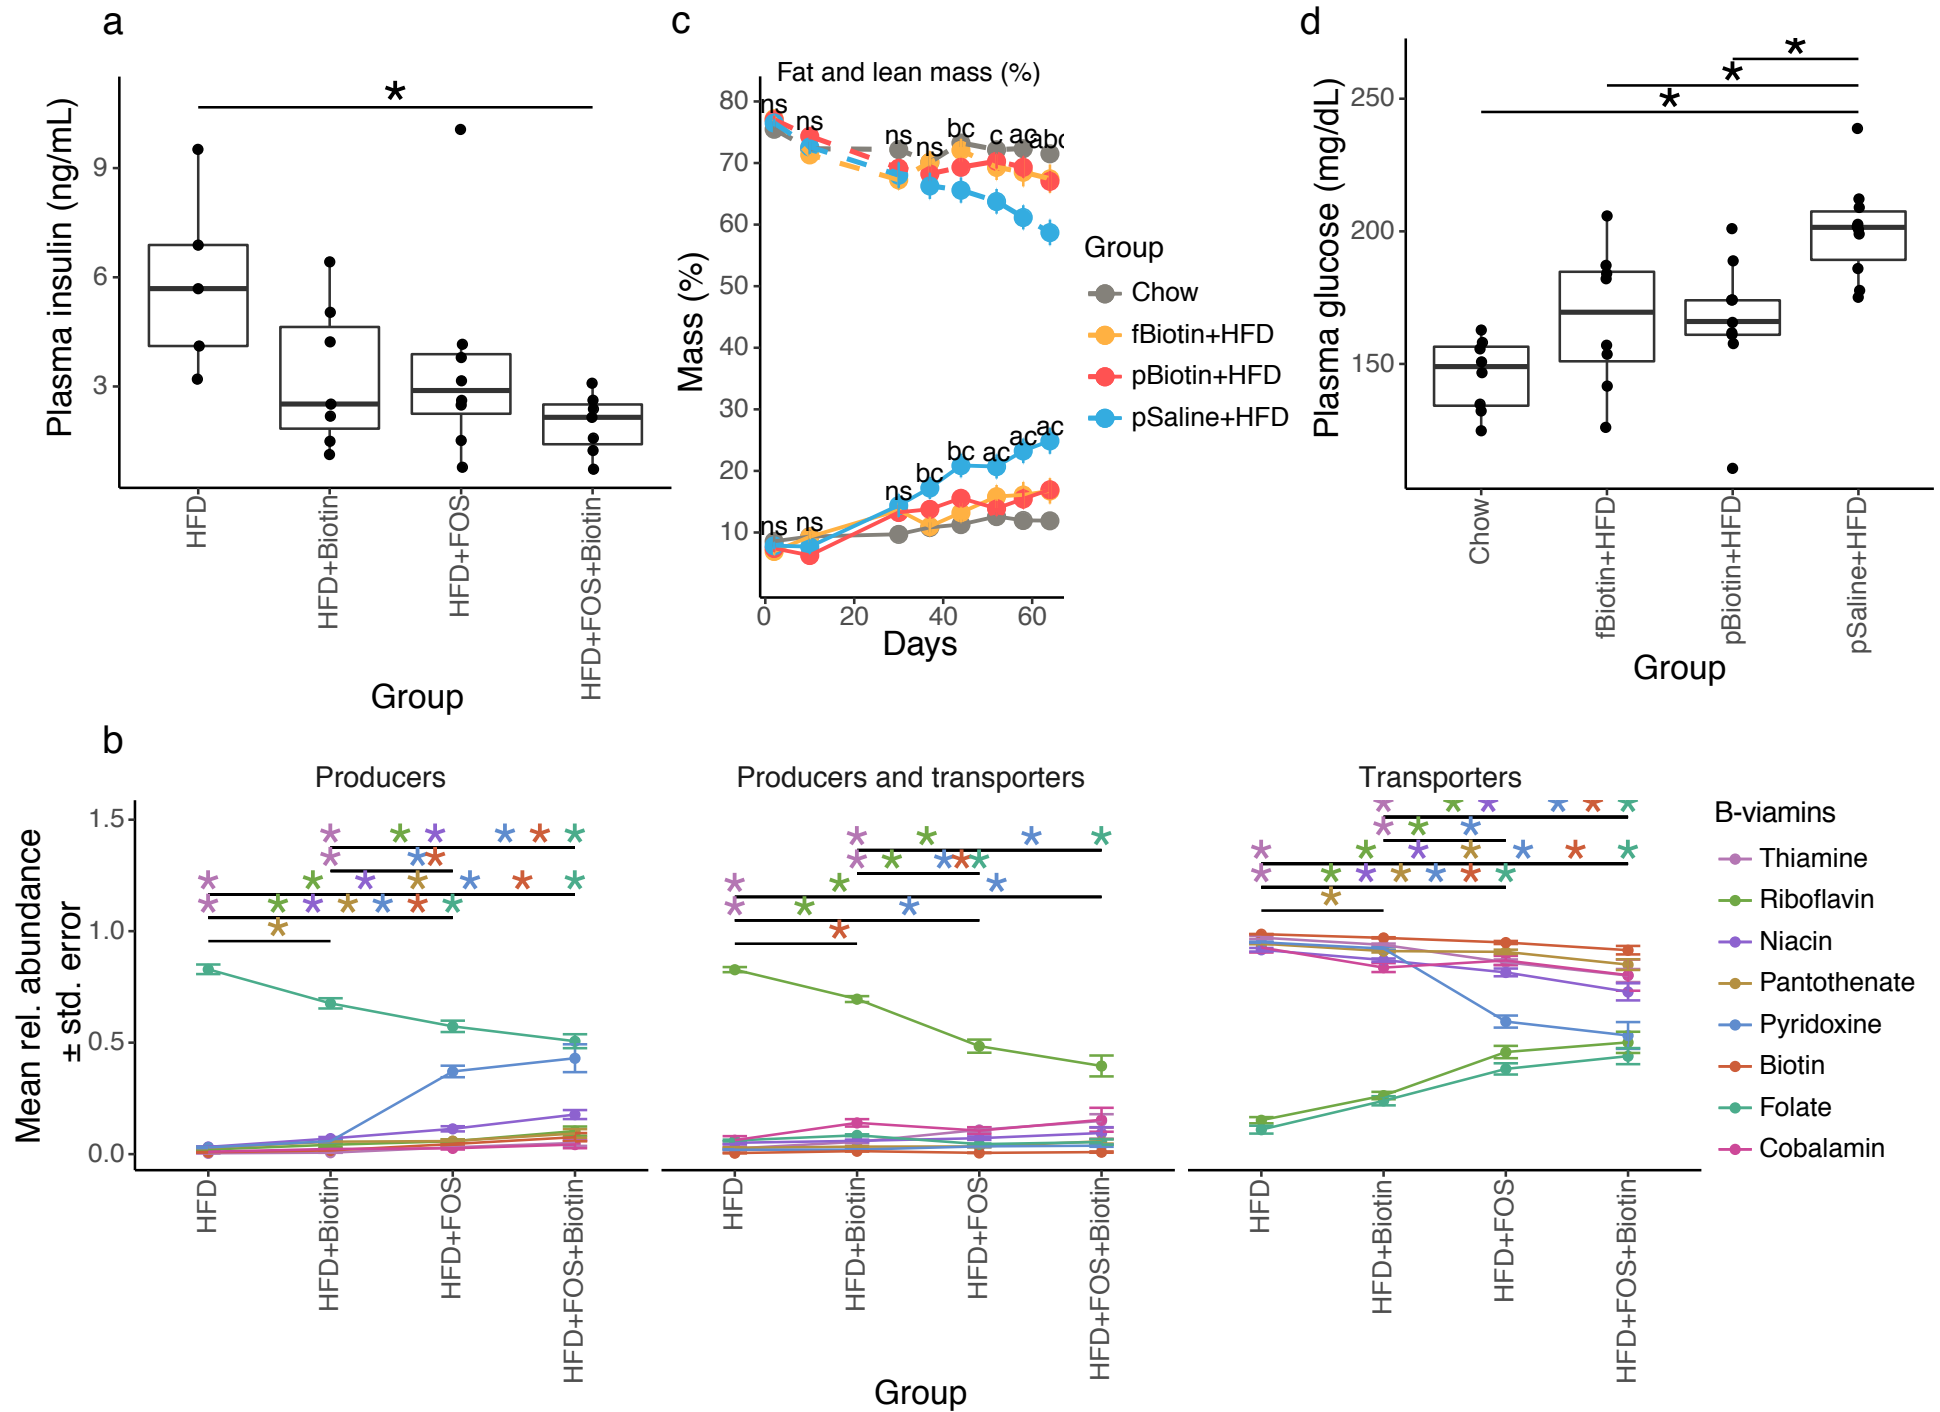

Supplement: gutjnl-2021-325753supp011.pdf [file gutjnl-2021-325753supp011.pdf]
